# Supplementary material for: Efficient hydrodeoxygenation of lignin-derived phenols and dimeric ethers with synergistic [Bmim]PF6-Ru/SBA-15 catalysis under acid free conditions
Source: Royal Society of Chemistry journal article supplement (doi:10.1039/c8gc03775b), 2019-01-01
Supplement: c8gc03775b1.pdf [file c8gc03775b1.pdf]

## Supporting information

### Efficient Hydrodeoxygenation of Lignin-Derived Phenols and Dimeric Ethers with Synergistic [Bmim]PF<sub>6</sub>-Ru/SBA-15 Catalysis Under Acid Free Conditions

Shaoqi Yang<sup>a, b</sup>, Xingmei Lu<sup>\* a, b</sup>, Haoyu Yao<sup>a</sup>, Jiayu Xin<sup>a</sup>, Junli Xu<sup>a</sup>, Ying Kang<sup>a</sup>,

Yongqing Yang<sup>a</sup>, Guangming Cai<sup>a</sup>, Suojiang Zhang<sup>\* a, b</sup>

<sup>a</sup> Beijing Key Laboratory of Ionic Liquids Clean Process, CAS Key Laboratory of Green Process and Engineering, State Key Laboratory of Multiphase Complex Systems, Institute of Process Engineering, Chinese Academy of Sciences, Beijing 100190 (PR China)

<sup>b</sup> Sino Danish College, University of Chinese Academy of Sciences, Beijing 100049 (PR China)

(Pages from S1-S13, Figures from S1-S8, Tables from S1-S2)

---

#### Corresponding Authors

\*Xingmei Lu. Email: [xmlu@ipe.ac.cn](mailto:xmlu@ipe.ac.cn).

\*Suojiang Zhang. Email: [sjzhang@ipe.ac.cn](mailto:sjzhang@ipe.ac.cn).

Tel: +86 10 82627080; Fax: +86 10 82544875

# 1. $^1\text{H}/^{13}\text{C}$ NMR spectrum of the ILs

## 1.1. [Bmim]PF<sub>6</sub>

BPF6

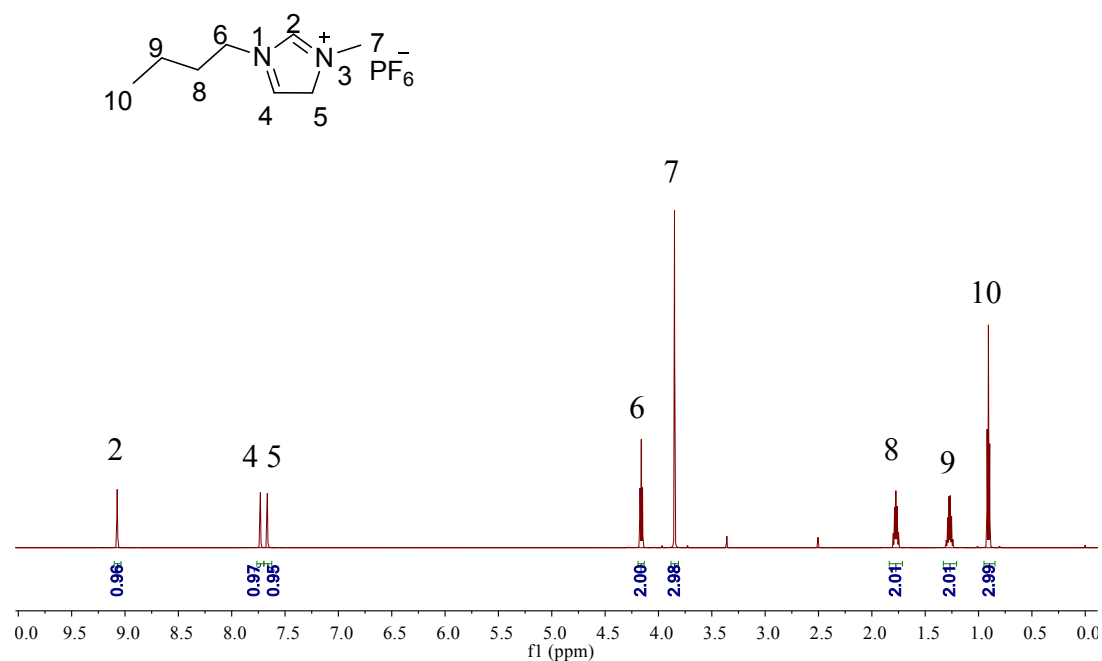

BPF6

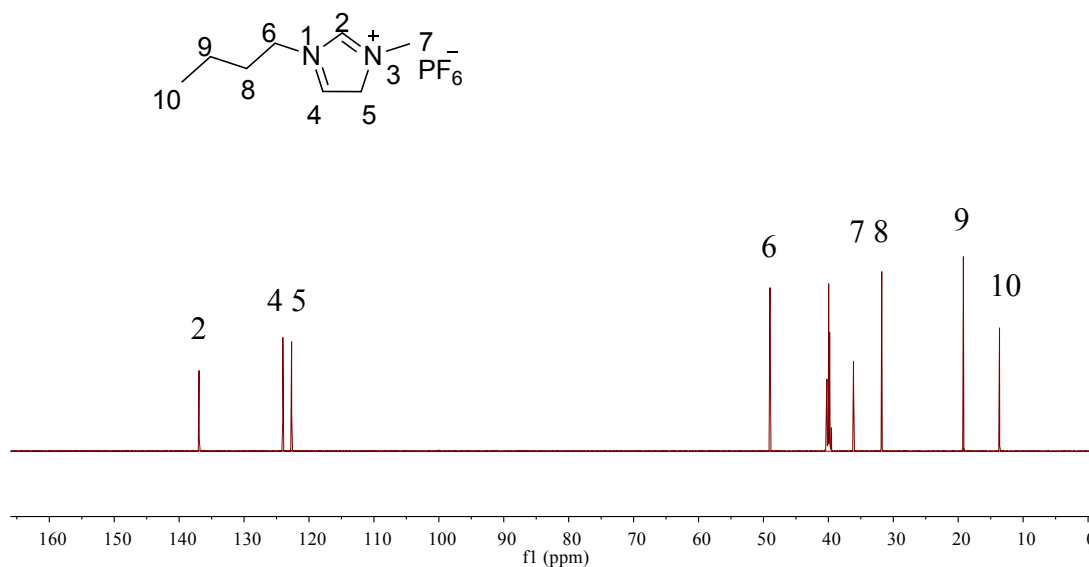

**1-Butyl-3-methylimidazolium hexafluorophosphate ([Bmim]PF<sub>6</sub>):** Colorless liquid,  
 $^1\text{H}$ -NMR (DMSO, 600MHz):  $\delta$  (ppm) = 9.07 (s, 1H), 7.73 (d,  $J = 1.1\text{Hz}$  1H), 7.67 (d,

$J = 1.0\text{Hz}$ , 1H), 4.16 (t,  $J = 7.2\text{Hz}$ , 2H), 3.85 (s, 3H), 1.84-1.71 (m, 2H), 1.33-1.21 (m, 2H), 0.91 (t,  $J = 7.4\text{Hz}$ , 3H);  $^{13}\text{C}$  NMR ( $\text{D}_2\text{O}$ , 600MHz)  $\delta$  (ppm) = 136.93, 124.03, 122.67, 48.99, 36.13, 31.78, 19.21, 13.64. HRMS (m/z, microTOF-Q II): calculated for  $[\text{Bmim}]^+$  139.1230, found 139.1259, calculated for  $\text{PF}_6^-$  144.9647, found 144.9618.

## 1.2. $[\text{Bmim}]\text{BF}_4$

BBF4

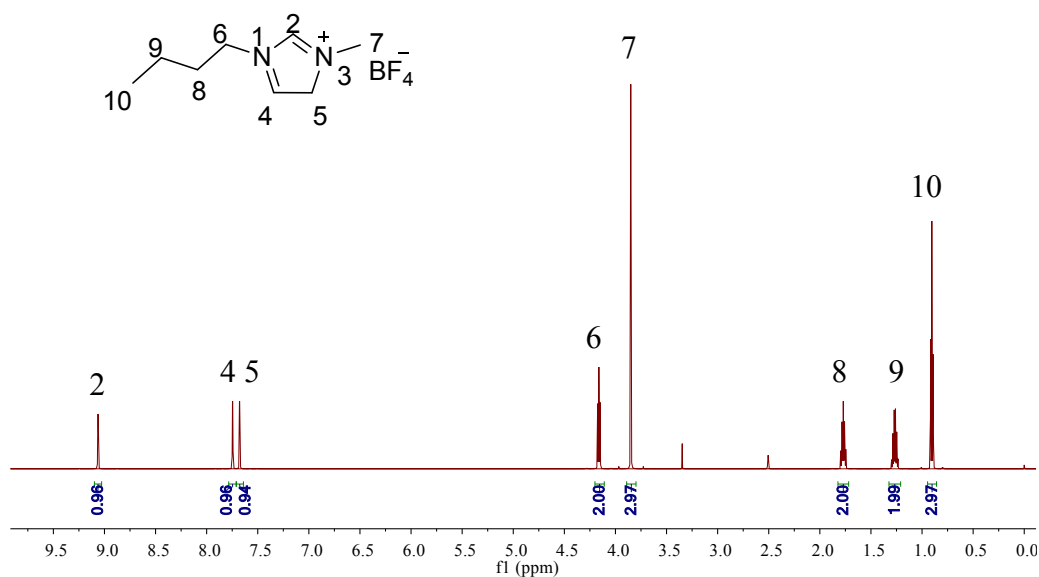

BBF4

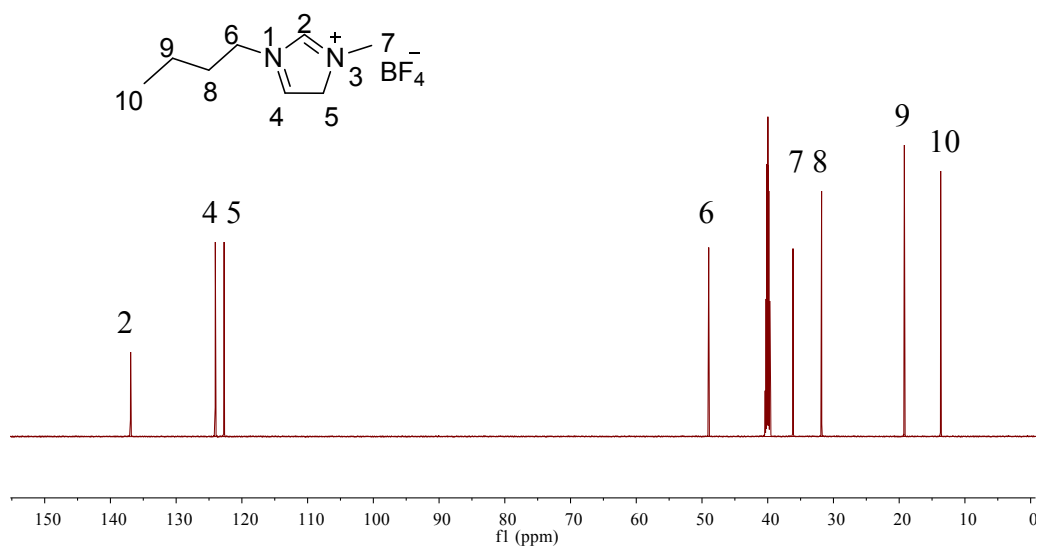

**1-n-butyl-3-methylimidazolium tetrafluoroborate ([Bmim]BF<sub>4</sub>):** Colorless liquid, <sup>1</sup>H-NMR (DMSO, 600MHz): δ (ppm) = 9.06 (s, 1H), 7.75 (t, *J* = 1.7Hz, 1H), 7.68 (t, *J* = 1.7Hz, 1H), 4.16 (t, *J* = 7.2Hz, 2H), 3.85 (s, 3H), 1.82-1.72 (m, 2H), 1.32-1.21 (m, 2H), 0.90 (t, *J* = 7.4Hz, 3H); <sup>13</sup>C NMR (D<sub>2</sub>O, 600MHz) δ (ppm) = 136.93, 124.05, 122.70, 48.97, 36.15, 31.80, 19.22, 13.68. HRMS (m/z, microTOF-Q II): calculated for [Bmim]<sup>+</sup> 139.1230, found 139.1254, calculated for BF<sub>4</sub><sup>-</sup> 87.0035, found 86.9970.

### 1.3. [Bmim]NTf<sub>2</sub>

BNTf2

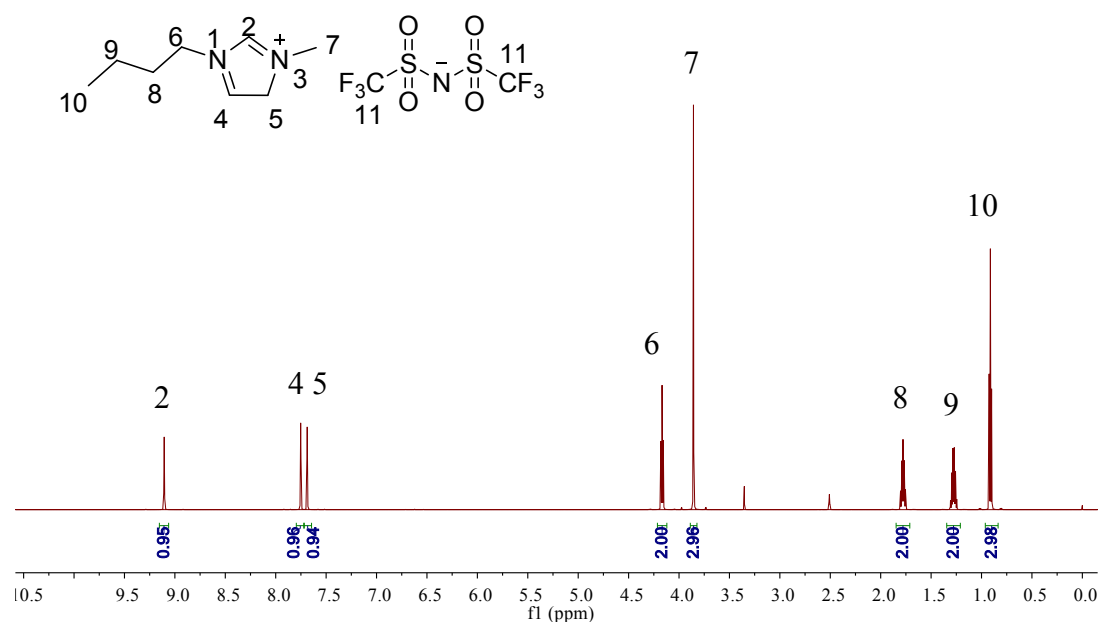

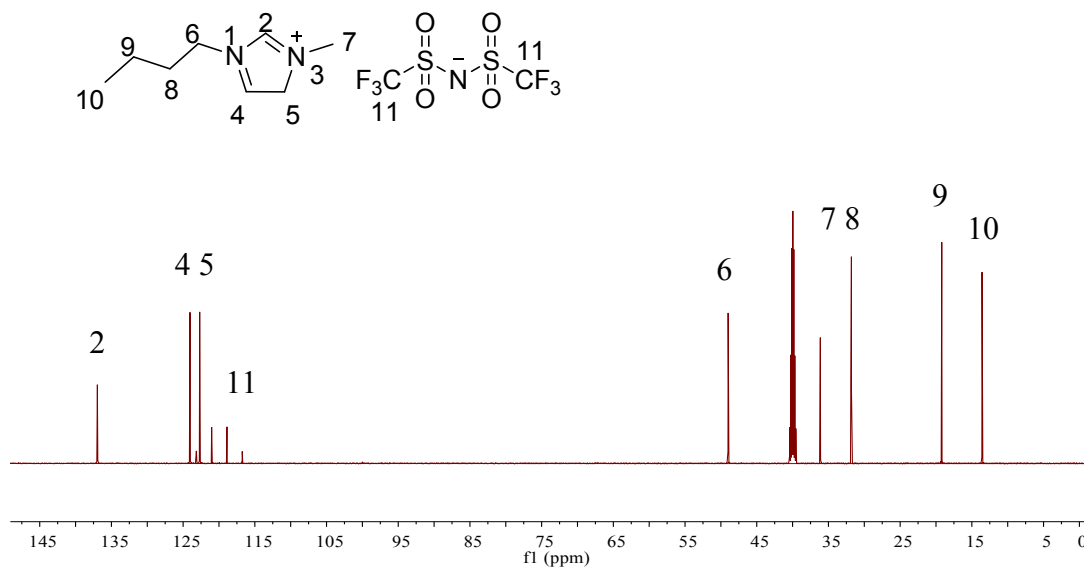

**1-n-butyl-3-methylimidazolium N-bis-(trifluoromethanesulfonyl) imidate**

**([Bmim]NTf<sub>2</sub>):** Colorless liquid, <sup>1</sup>H-NMR (DMSO, 600MHz): δ (ppm) = 9.11 (s, 1H), 7.75 (t, *J* = 1.7Hz, 1H), 7.69 (t, *J* = 1.7Hz, 1H), 4.17 (t, *J* = 7.2Hz, 2H), 3.86 (s, 3H), 1.85-1.71 (m, 2H), 1.34-1.21 (m, 2H), 0.91 (t, *J* = 7.4Hz, 3H); <sup>13</sup>C NMR (D<sub>2</sub>O, 600MHz) δ (ppm) = 136.96, 124.04, 122.69, 123.16-116.76 (m), 48.99, 36.13, 31.80, 19.20, 13.58. HRMS (m/z, micrOTOF-Q II): calculated for [Bmim]<sup>+</sup> 139.1230, found 139.1259, calculated for NTf<sub>2</sub><sup>-</sup> 279.9178, found 279.9099.

1.4. [Emim]NTf<sub>2</sub>

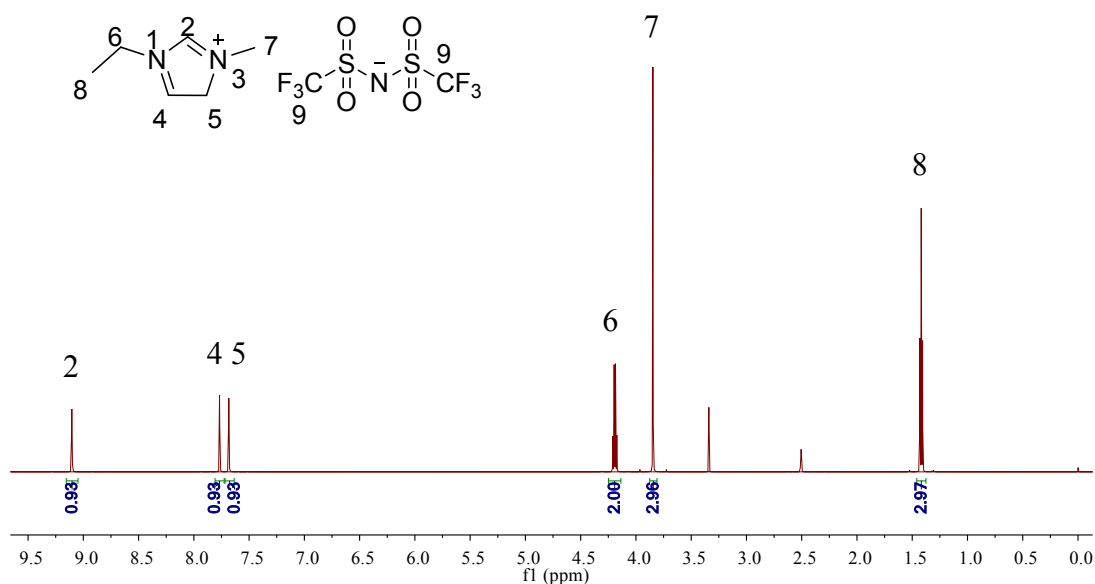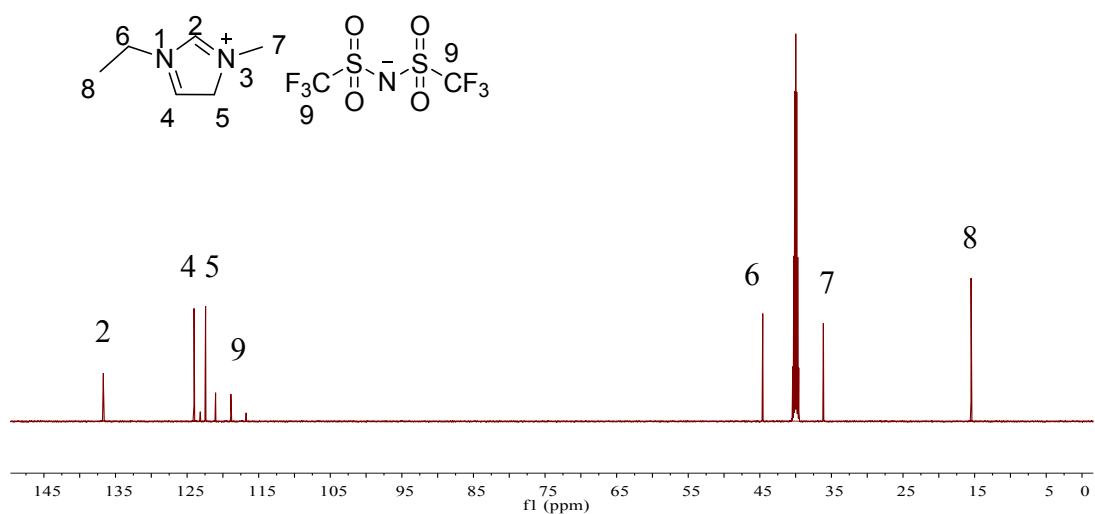

**1-ethyl-3-methylimidazolium N-bis-(trifluoromethanesulfonyl) imidate ([Bmim]NTf<sub>2</sub>):** Colorless liquid, <sup>1</sup>H-NMR (DMSO, 600MHz): δ (ppm) = 9.10 (s, 1H), 7.77 (t, *J* = 1.7Hz, 1H), 7.68 (t, *J* = 1.7Hz, 1H), 4.19 (q, *J* = 7.3Hz, 2H), 3.85 (s, 3H), 1.42 (t, *J* = 7.3Hz, 3H); <sup>13</sup>C NMR (D<sub>2</sub>O, 600MHz) δ (ppm) = 136.69, 124.03, 122.42, 123.15-116.75 (m), 44.60, 36.13, 15.49. HRMS (m/z, microTOF-Q II): calculated for [Emim]<sup>+</sup> 111.0917, found 111.0927, calculated for NTf<sub>2</sub><sup>-</sup> 279.9178, found 279.9038.

## 2. Characterization of the catalysts

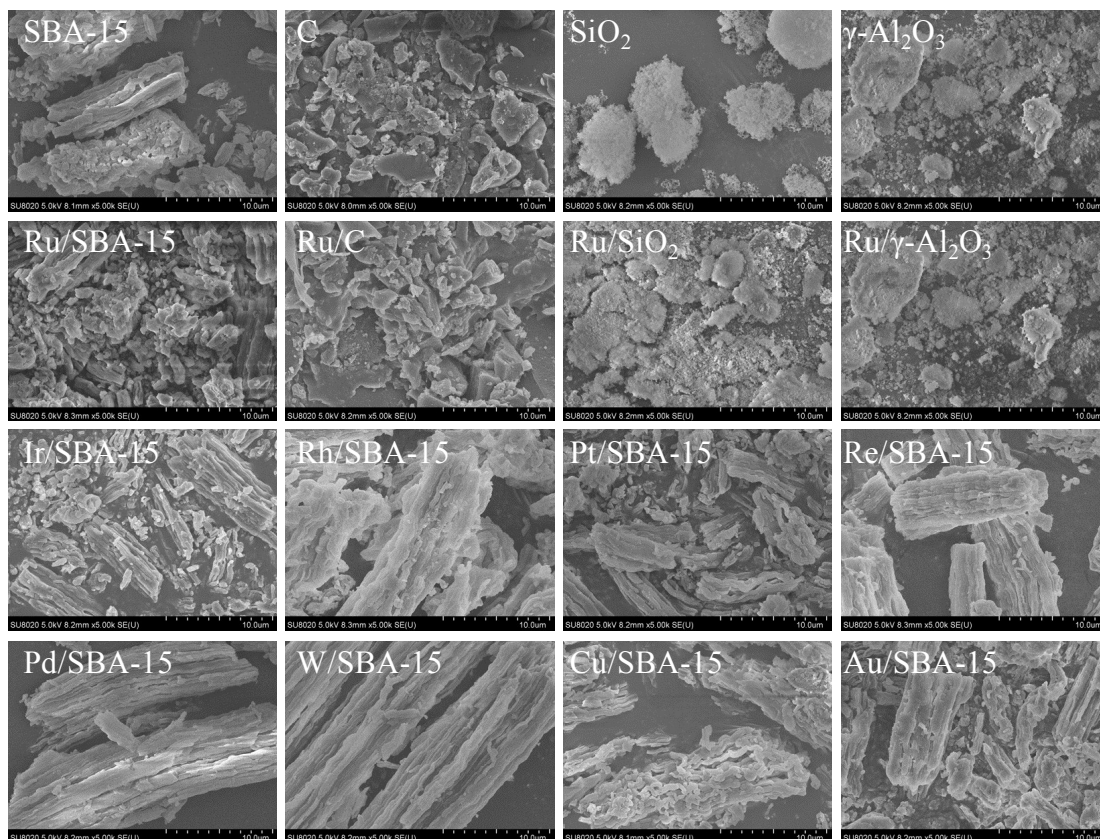

Figure S1. SEM graphics of catalysts.

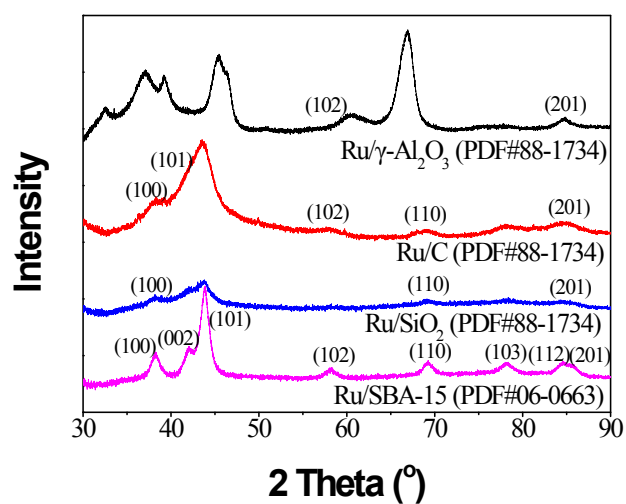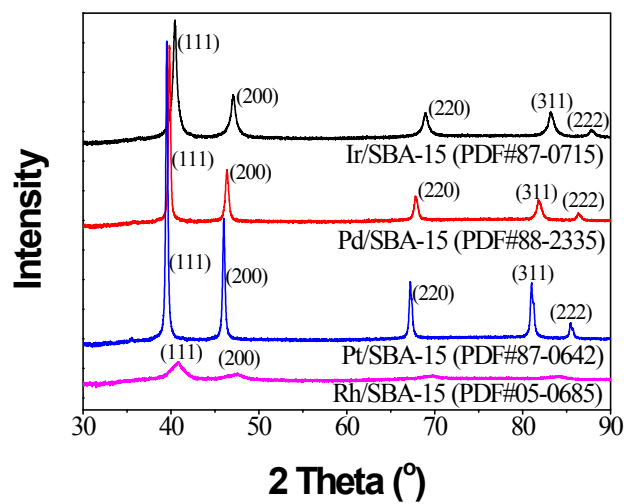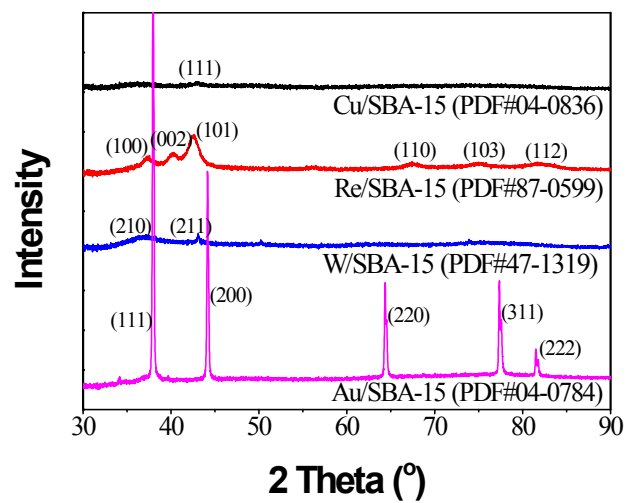

Figure S2. XRD patterns of the catalysts.



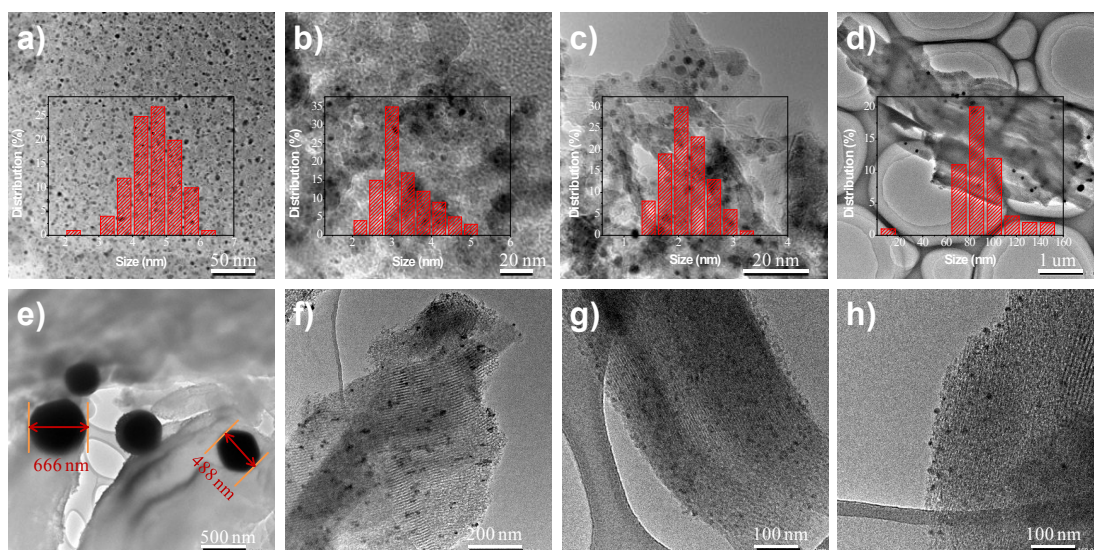

**Figure S3.** TEM images of (a) Ru/C, (b) Ru/SiO<sub>2</sub>, (c) Ru/ $\gamma$ -Al<sub>2</sub>O<sub>3</sub>, (d) Pd/SBA-15, (e) Au/SBA-15, (f) Re/SBA-15, (g) W/SBA-15, (h) Cu/SBA-15.

### 3. Experimental section

The conversions of substrates and yields of corresponding aliphatic alkanes were calculated based on the following formulas:

$$\text{Conversion} = \frac{\text{Moles of phenols used} - \text{Moles of phenols remimed}}{\text{Moles of phenols used}} \times 100\%$$

$$\text{Conversion} = \frac{\text{Moles of dimeric ethers used} - \text{Moles of dimeric ethers remimed}}{\text{Moles of dimeric ethers used}} \times 100\%$$

$$\text{Yield of alkanes} = \frac{\text{Moles of alkanes generated}}{\text{Moles of phenols (dimeric ethers} \times 2) \text{ used}} \times 100\%$$

**Table S1.** Catalytic activity of different catalysts for the HDO of phenol.<sup>a</sup>

Oc1ccc(O)cc1 **1**  $\xrightarrow[\text{[Bmim]PF}_6]{\text{Catalyst}}$  C1CCCCC1 **1a** + Oc1ccccc1 **1b** + C1CCC2CCCC2C1 **1c**

| Entry | Catalyst  | Conversion (%) <sup>b</sup> | Yield (%) <sup>b</sup> |    |    |
|-------|-----------|-----------------------------|------------------------|----|----|
|       |           |                             | 1a                     | 1b | 1c |
| 1     | None      | 0                           | 0                      | 0  | 0  |
| 2     | SBA-15    | 0                           | 0                      | 0  | 0  |
| 3     | Re/SBA-15 | 34.7                        | 15.9                   | 0  | 0  |
| 4     | Pd/SBA-15 | 28.2                        | 7.1                    | 0  | 0  |
| 5     | W/SBA-15  | 3.2                         | 1.2                    | 0  | 0  |
| 6     | Cu/SBA-15 | 5.7                         | 1.0                    | 0  | 0  |
| 7     | Au/SBA-15 | 1.0                         | 0.7                    | 0  | 0  |

<sup>a</sup> Reaction conditions: Phenol, 1 mmol; catalyst 0.1 g; [Bmim]PF<sub>6</sub>, 2.0 g; reaction temperature, 130 °C; reaction time, 6 h; pressure of H<sub>2</sub>, 2 MPa. <sup>b</sup> The conversion and yields were determined by GC with n-dodecane as a internal standard.

**Table S2.** The effect of different solvents for the HDO of phenol.<sup>a</sup>

Oc1ccc(O)cc1 **1**  $\xrightarrow[\text{Solvent, H}_2]{\text{Ru/SBA-15}}$  C1CCCCC1 **1a** + Oc1ccccc1 **1b** + C1CCC2CCCC2C1 **1c**

| Entry | Solvent                 | Conversion (%) <sup>b</sup> | Yield (%) <sup>b</sup> |      |    |
|-------|-------------------------|-----------------------------|------------------------|------|----|
|       |                         |                             | 1a                     | 1b   | 1c |
| 1     | [BHEM]mesy <sup>c</sup> | 100                         | 7.0                    | 59.8 | 0  |
| 2     | Methanol <sup>d</sup>   | 31.2                        | 2.2                    | 28.1 | 0  |
| 3     | Ethanol <sup>d</sup>    | 6.3                         | 4.6                    | 0    | 0  |
| 4     | n-Propanol <sup>d</sup> | 100                         | 1.6                    | 67.8 | 0  |
| 5     | n-Hexane <sup>d</sup>   | 100                         | 3.4                    | 76.5 | 0  |

<sup>a</sup> Reaction conditions: Phenol, 1 mmol; Ru/SBA-15, 0.1 g; <sup>c</sup> IL, 2.0 g, <sup>d</sup> solvent, 4.0 g; reaction temperature, 130 °C; reaction time, 6 h; pressure of H<sub>2</sub>, 2 MPa. <sup>c</sup> Refer to *Cellulose* **2018**, *25*, 3241-3254.

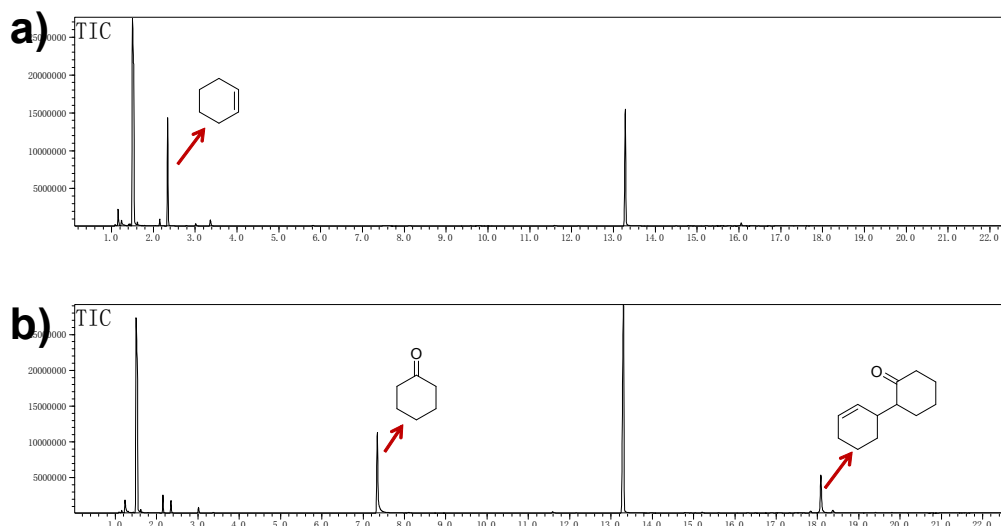

**Figure S4.** a) GC-MS of cyclohexanol HDO result, b) GC-MS of cyclohexanone HDO result. Reaction conditions: substrate, 1 mmol; [Bmim]PF<sub>6</sub>, 2.0 g, reaction temperature, 130 °C; reaction time, 6 h; pressure of H<sub>2</sub>, 2 MPa. N-dodecane was used as an internal standard.

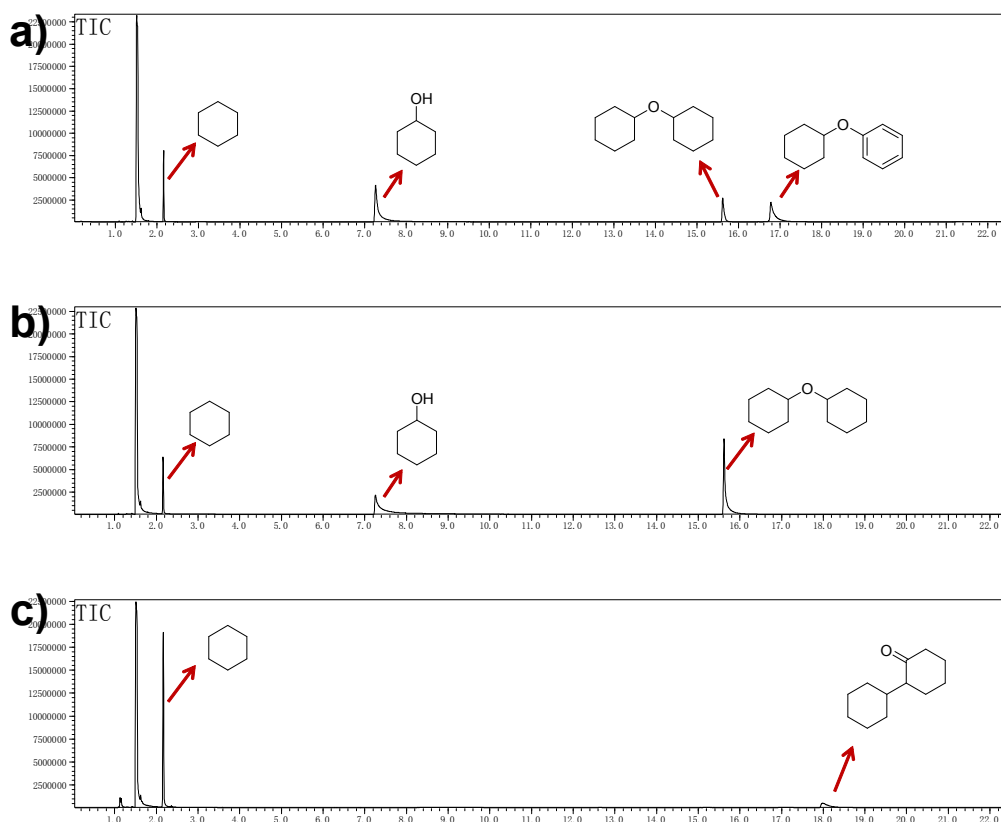

**Figure S5.** GC-MS of diphenyl ether HDO result. Reaction conditions: diphenyl ether, 1 mmol; [Bmim]PF<sub>6</sub>, 2.0 g, reaction temperature, 130 °C; reaction time, a) 0.2 h, b) 1

h, c) 4 h; pressure of H<sub>2</sub>, 2 MPa. N-dodecane was used as an internal standard.

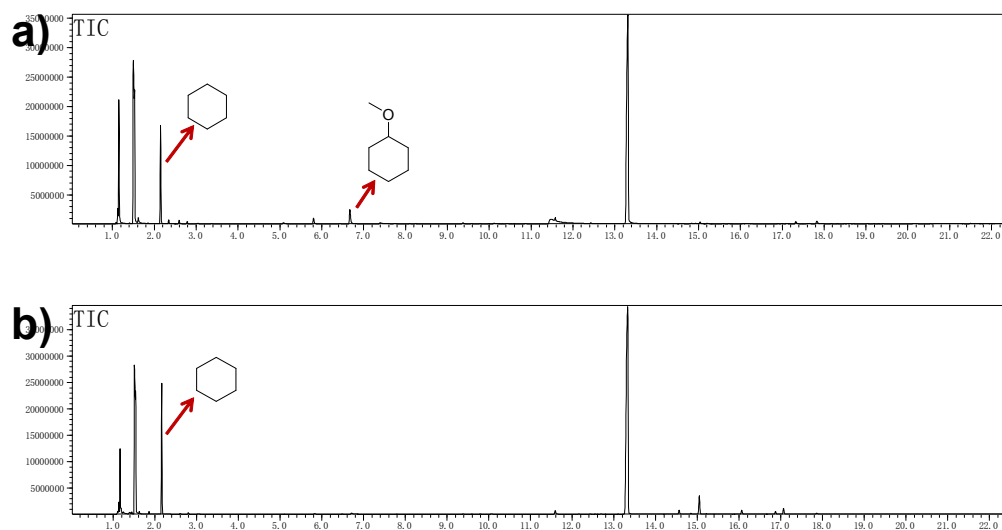

**Figure S6.** HDO of guaiacol at a) 130 °C for 6 hours, b) 150 °C for 6 hours. Reaction conditions: guaiacol, 1 mmol; [Bmim]PF<sub>6</sub>, 2.0 g, Ru/SBA-15, 0.1 g; pressure of H<sub>2</sub>, 2 MPa. N-dodecane was used as an internal standard.

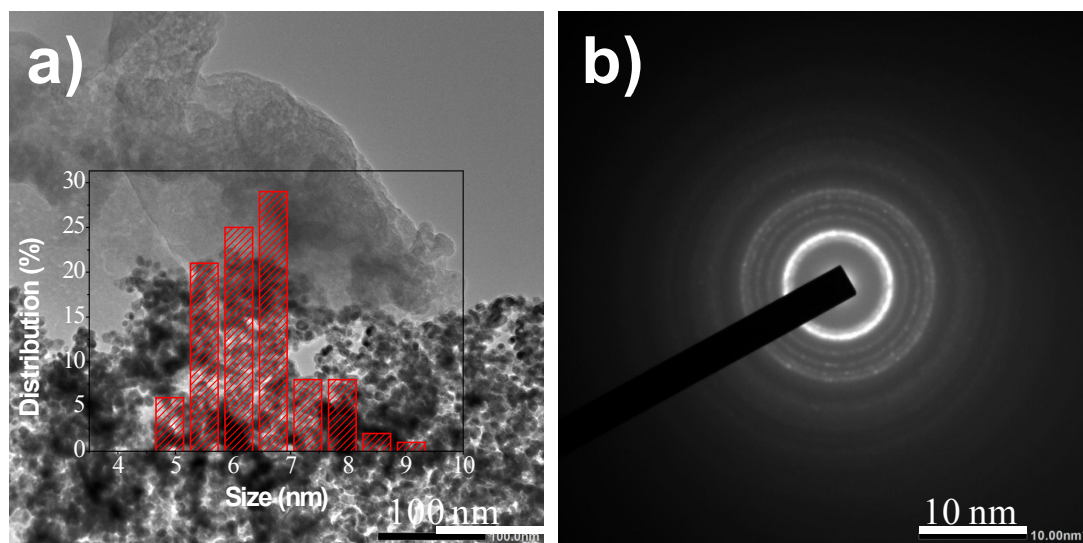

**Figure S7.** a) TEM images of recycle Ru/SBA-15, B) Electron diffraction rings for Ru NPs falling off from SBA-15.

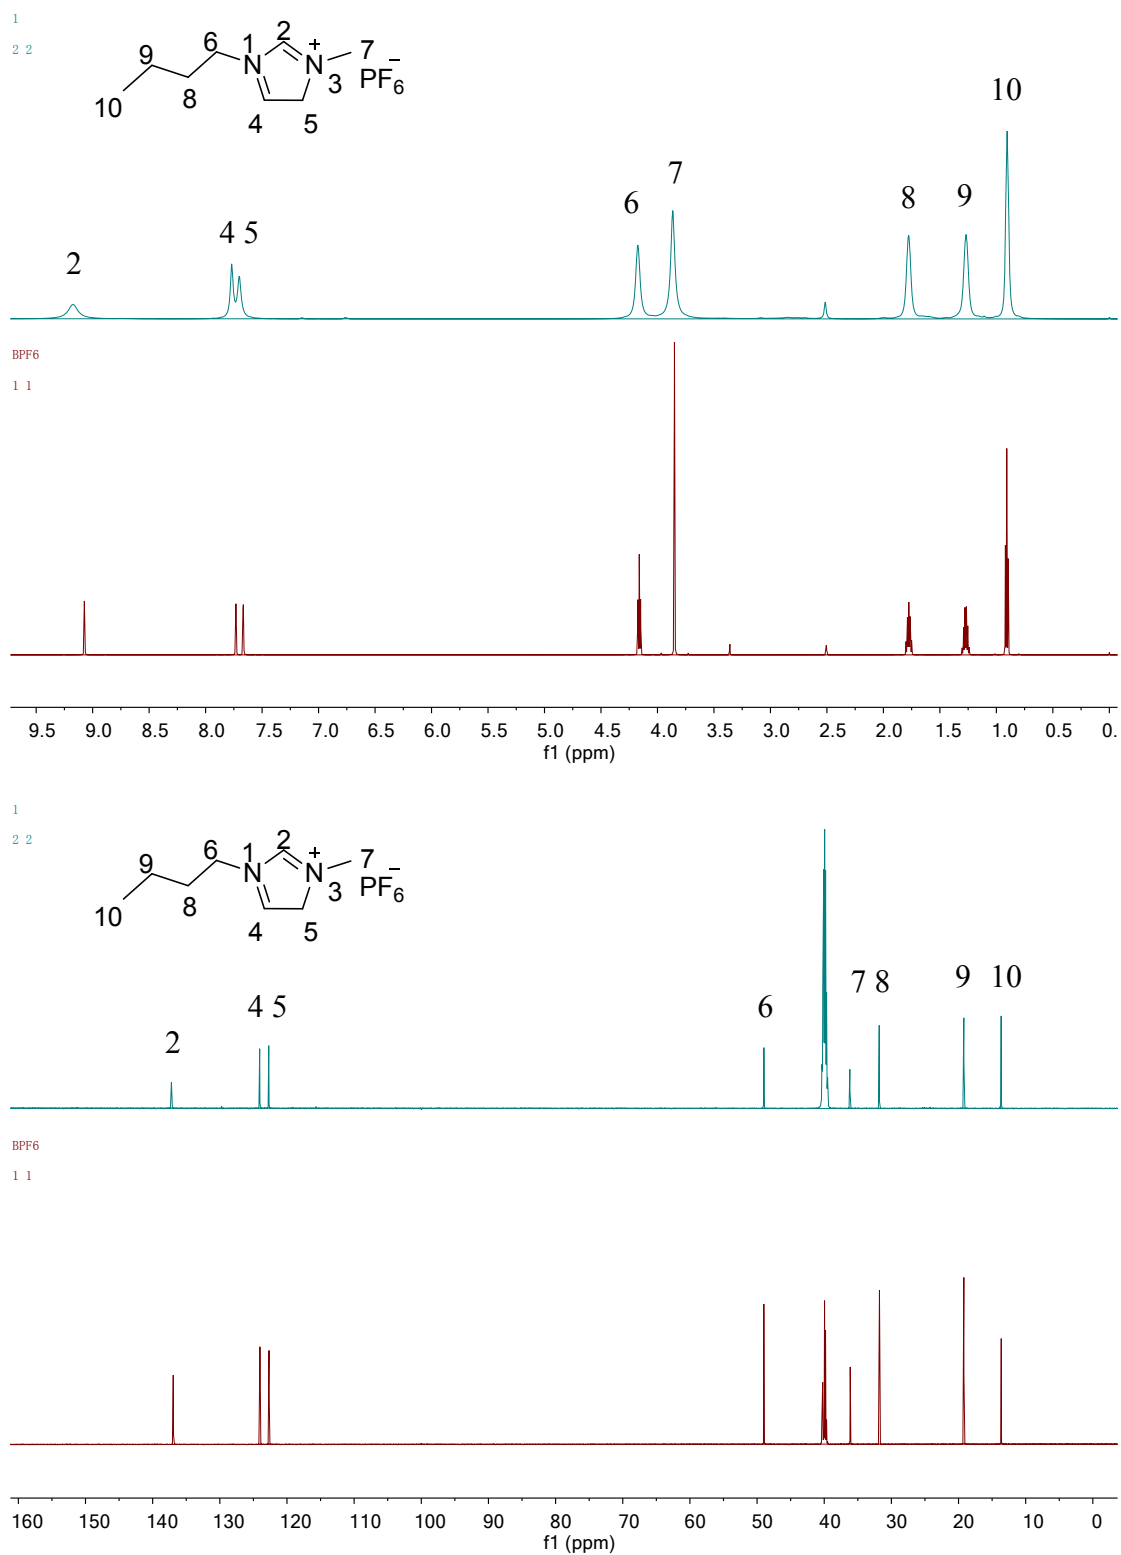

**Figure S8.** The <sup>1</sup>H/<sup>13</sup>C NMR spectroscopy of neat and recycled [Bmim]PF<sub>6</sub>.
